# Supplementary material for: Super-resolution imaging of STAT3 cellular clustering during nuclear transport
Source: Royal Society of Chemistry journal article supplement (doi:10.1039/c6ra09591g), 2016-01-01
Supplement: c6ra09591g1.pdf [file c6ra09591g1.pdf]

## Supporting Information for

### Super-resolution imaging of STAT3 cellular clustering during the nuclear transport

Jing Gao,<sup>a</sup> Feng Wang,<sup>c</sup> Junling Chen,<sup>a,b</sup> Jianzhong Wang,<sup>d</sup> Mingjun Cai,<sup>a</sup> Haijiao Xu,<sup>a</sup> Janguang Jiang,<sup>a</sup> and Hongda Wang<sup>\*a</sup>

<sup>a</sup>State Key Laboratory of Electroanalytical Chemistry, Changchun Institute of Applied Chemistry, Chinese Academy of Sciences, Changchun, China.

<sup>b</sup>University of Chinese Academy of Sciences, Beijing, China.

<sup>c</sup>Institute of Immunology, The First Bethune Hospital Academy of Translational Medicine, Jilin University, Changchun, China.

<sup>d</sup>School of Computer Science and Information Technology, Northeast Normal University, Changchun, China

\*Email: hdwang@ciac.ac.cn

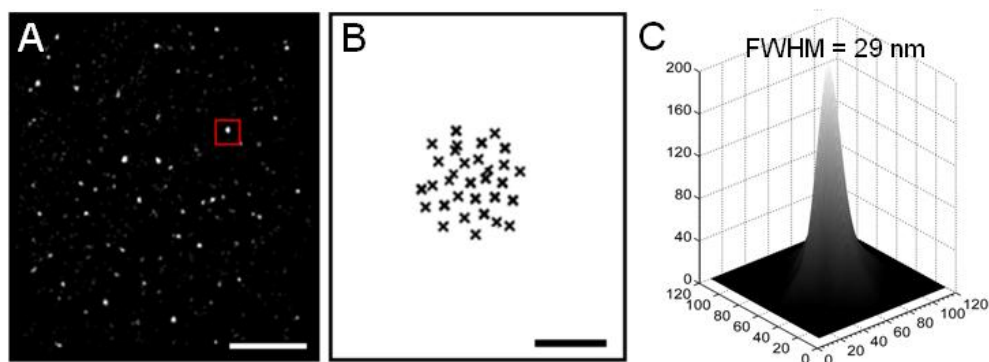

**Fig. S1** The localization precision of single Alexa Fluor 647-conjugated STAT3 antibody on fixed and permeabilized HeLa cells. (A) The dSTORM image of adequately diluted Alexa Fluor 647-STAT3 antibody molecules on HeLa cells. (B) Repetitive localizations of a single Alexa Fluor 647-STAT3 antibody boxed in (A) and the number of localizations in this molecule is 31. (C) The average value of single molecule localization precision is 29 nm. The two-dimensional histograms of localizations were generated by aligning 100 fluorescent molecules with their center of mass and fitted to a Gaussian function to determine the full-width at half-maximum (FWHM). Scale bars represent 1  $\mu\text{m}$  in (A) and 20 nm in (B).

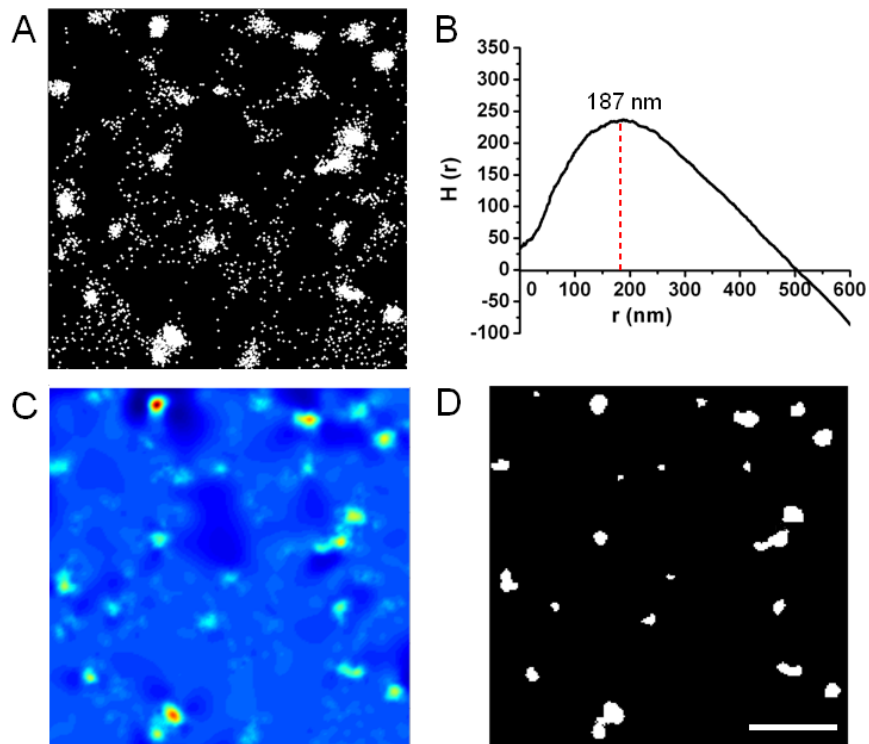

**Fig. S2** Illustration of Ripley's K-function analysis for STAT3 clustering. (A) A  $4 \times 4 \mu\text{m}^2$  region of the reconstructed dSTORM image of STAT3 in the cytoplasm of the unstimulated HeLa cell. (B) The corresponding Ripley's K-function plot showing that the radius of maximal aggregation is 187 nm and clustering range on length scales at 500 nm. (C) The interpolated cluster map based on Ripley's K-function analysis indicating a significant clustering distribution. (D) The binary cluster image generated from the color-coded cluster map through a defined threshold, from which the cluster number, size and other information can be extracted. Scale bar represents 1  $\mu\text{m}$ .

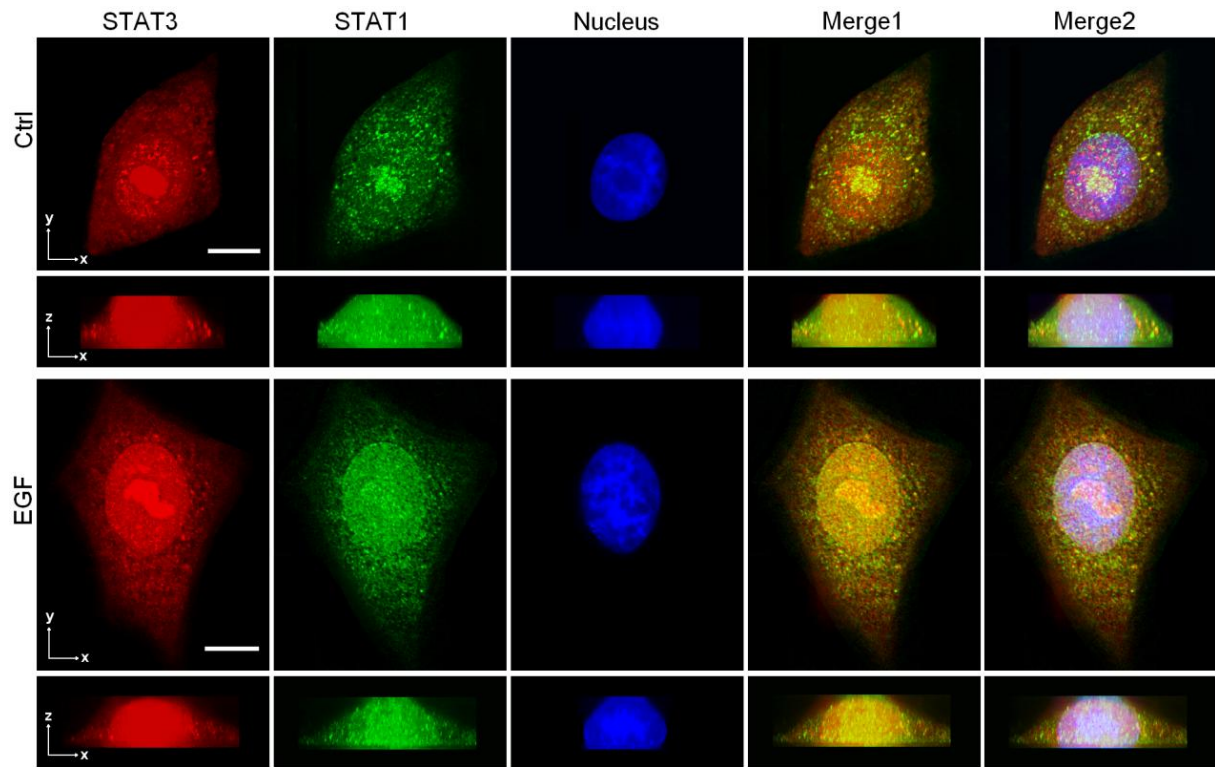

**Fig. S3** 3D fluorescence imaging of STAT3 and STAT1 in HeLa cells. HeLa cells, without stimulation and with 30 min-EGF stimulation, were fixed, permeated and stained with Alexa Fluor 647-conjugated STAT3 antibodies, Alexa Fluor 532-conjugated STAT1 antibodies and Hoechst 33342. The fluorescence images of control HeLa cell are shown in the first row, which were captured at approximately 3  $\mu\text{m}$  above the bottom of the cell. The 3D images of control HeLa cell were shown in the second row, which were constructed by successive z-stacks spaced by 200 nm from the bottom to the top of the cell. The total distance of scanned z-axis is 8  $\mu\text{m}$ . The third and fourth rows are the results of EGF-stimulated HeLa cell. From left to right: STAT3, STAT1, the nucleus, merged panels of STAT3 and STAT1 (Merge 1) and merged panels of STAT3, STAT1 and the nucleus (Merge 2). Scale bars represent 10  $\mu\text{m}$ .

**Table S1** The parameters of STAT3 clustering by Ripley's K-function analysis.

| Time<br>(min) | Cytoplasm              |                   |                        | Nucleoplasm       |              |                   |
|---------------|------------------------|-------------------|------------------------|-------------------|--------------|-------------------|
|               | $r_{ave}^{a)}$<br>(nm) | $H(r)_{max}^{b)}$ | $r_{max}^{c)}$<br>(nm) | $r_{ave}$<br>(nm) | $H(r)_{max}$ | $r_{max}$<br>(nm) |
| 0             | 180 ± 14               | 242 ± 22          | 498 ± 35               | 105 ± 13          | 96 ± 10      | 340 ± 27          |
| 20            | 166 ± 10               | 287 ± 20          | 551 ± 42               | 204 ± 18          | 154 ± 13     | 386 ± 31          |
| 40            | 177 ± 13               | 309 ± 27          | 549 ± 44               | 191 ± 15          | 165 ± 17     | 405 ± 39          |
| 60            | 209 ± 19               | 292 ± 24          | 538 ± 37               | 158 ± 11          | 122 ± 14     | 320 ± 24          |
| 120           | 193 ± 16               | 245 ± 22          | 526 ± 31               | 121 ± 10          | 113 ± 12     | 316 ± 21          |
| 240           | 188 ± 17               | 265 ± 23          | 502 ± 39               | 87 ± 8            | 88 ± 9       | 302 ± 20          |

<sup>a)</sup> the  $r$  value corresponding to the maximum of  $H(r)$ ; <sup>b)</sup> the vertex of the curve; <sup>c)</sup> the intercept of the curve at the horizontal axis.

Ripley's K function is applied in the regions ( $4 \times 4 \mu\text{m}^2$ ) of STAT3 dSTORM images at different stimulation times. Every group includes 20 cells from five independent experiments, and each cell is chosen three regions in both the cytoplasm and nucleoplasm. The values of every parameter are the mean  $\pm$  s.d.

**Table S2** The parameters of EGF-induced STAT3 and STAT1 clustering by Ripley's K-function analysis.

| Name  | Treatment | Cytoplasm         |              |                   | Nucleoplasm       |              |                   |
|-------|-----------|-------------------|--------------|-------------------|-------------------|--------------|-------------------|
|       |           | $r_{ave}$<br>(nm) | $H(r)_{max}$ | $r_{max}$<br>(nm) | $r_{ave}$<br>(nm) | $H(r)_{max}$ | $r_{max}$<br>(nm) |
| STAT3 | Ctrl      | 179 ± 13          | 251 ± 24     | 504 ± 36          | 108 ± 10          | 105 ± 10     | 352 ± 28          |
|       | EGF       | 175 ± 12          | 289 ± 26     | 543 ± 47          | 214 ± 23          | 172 ± 13     | 411 ± 40          |
| STAT1 | Ctrl      | 184 ± 14          | 263 ± 25     | 515 ± 40          | 113 ± 11          | 112 ± 13     | 362 ± 31          |
|       | EGF       | 181 ± 13          | 294 ± 27     | 559 ± 46          | 210 ± 17          | 183 ± 15     | 407 ± 38          |

Ripley's K function is applied in the regions ( $4 \times 4 \mu\text{m}^2$ ) of STAT3 and STAT1 dSTORM images before and after EGF addition. Every group includes 20 cells from five independent experiments, and each cell is selected three regions in both the cytoplasm and nucleoplasm. The values of every parameter are the mean  $\pm$  s.d.
